# Supplementary material
Source: PubMed Central journal article supplement (PMC6583584)
Supplement: jama-320-2108-s002.pdf [file jama-320-2108-s002.pdf]

## Supplementary Online Content

Banerji A, Riedl MA, Bernstein JA, et al. Effect of lanadelumab compared with placebo on prevention of hereditary angioedema attacks: a randomized clinical trial. *JAMA*. doi:10.1001/jama.2018.16501

**eMethods 1.** Inclusion and Exclusion Criteria

**eMethods 2.** Criteria for Investigator-Confirmed Hereditary Angioedema Attacks

**eMethods 3.** Treatment Period Dosing Schedule

**eMethods 4.** Assessment of Attacks and Adverse Events

**eMethods 5.** Statistical Analysis

**eFigure 1.** Study Design

**eFigure 2.** Mean HAE Attack Rates by Study Month and Treatment Group

**eTable 1.** HELP Study Administrative Structure

**eTable 2.** Duration of Treatment for Patients Who Discontinued

**eTable 3.** Number of Patients by Duration of Run-in Period

**eTable 4.** Number of Patients by Run-in Attack Rate Category

**eTable 5.** Primary Attack Location During Run-in and Treatment Period

**eTable 6.** Duration of Attacks

**eTable 7.** Summary of On-Demand Treatment for Attacks and the Use of Supportive Therapies for Symptoms

**eTable 8.** Efficacy Outcomes by Subgroup

**eTable 9.** Tipping Point Analysis

**eTable 10.** Number of Patients by Geographical Region

**eTable 11.** Mean Number of Attacks Days 0-182, Adjusted by Geographical Region

**eTable 12.** Listing of Patients Who Discontinued During Treatment Due to Adverse Events

**eTable 13.** Summary of Serious Treatment-Emergent Adverse Events

**eTable 14.** Summary of Activated Partial Thromboplastin Time

**eTable 15.** Shift Table of Highest Activated Partial Thromboplastin Time

**eTable 16.** Clinically Significant Activated Partial Thromboplastin Time Results

**eTable 17.** Summary of Immunogenicity Response

**eTable 18.** Summary of Positive Immunogenicity Results

This supplementary material has been provided by the authors to give readers additional information about their work.

## eMethods 1. Inclusion and Exclusion Criteria

### *Inclusion Criteria*

Each patient must have met the following criteria to be enrolled in this study:

1. Males and females  $\geq 12$  years of age at the time of screening.
2. Documented diagnosis of hereditary angioedema (type I or II) based upon all of the following:
  - Documented clinical history consistent with hereditary angioedema (subcutaneous or mucosal, nonpruritic swelling episodes without accompanying urticaria).
  - Diagnostic testing results obtained during screening that confirmed hereditary angioedema type I or II:
    - C1 inhibitor functional level  $< 40\%$  of the normal level. Patients with functional C1 inhibitor level  $40\%$ - $50\%$  of the normal level may have been enrolled if they also had a C4 level below the normal range. Patients may have begun participating in the run-in period before these diagnostic results were available. Patients may have been retested if results were incongruent with clinical history or were believed by the investigator to have been confounded by recent long-term prophylaxis use.
    - At least 1 of the following:  $\leq 30$  years of age at reported onset of first angioedema symptoms, a family history consistent with hereditary angioedema type I or II, or C1q within the normal range.
3. Experienced a baseline rate of  $\geq 1$  investigator-confirmed hereditary angioedema attack per 4 weeks as confirmed during the run-in period.
4. Adult patients and caregivers of patients  $< 18$  years of age willing and able to read, understand, and sign an informed consent form. Patients 12-17 years of age, whose caregiver provided informed consent, willing and able to read, understand, and sign an assent form.
5. Males and females who were fertile and sexually active must have adhered to contraception requirements for the duration of the study as follows:
  - Females of childbearing potential must have agreed to be abstinent or it was recommended to use highly effective forms of contraception from screening through 30 days after the final study visit. This included progestin-only oral contraceptive associated with inhibition of ovulation (oral, injectable, or implantable), intrauterine device (all types), or intrauterine hormone releasing systems. Notes: (1) A female whose male partner had a vasectomy must have agreed to use 1 additional form of medically acceptable contraception; and (2) Use of a male condom with or without spermicide or cervical cap, diaphragm or sponge with spermicide, or a combination (double-barrier methods) was not considered highly effective.
  - Females of nonchildbearing potential, defined as surgically sterile (status post hysterectomy, bilateral oophorectomy, or bilateral tubal ligation) or postmenopausal for  $\geq 12$  months did not require contraception during the study.
  - Males, including males who were surgically sterile (post vasectomy), with female partners of childbearing potential must have agreed to be abstinent or use a medically acceptable form of contraception from screening through 60 days after the final study visit.

### *Exclusion Criteria*

Patients who met any of the following criteria were excluded from the study:

1. Concomitant diagnosis of another form of chronic recurrent angioedema, such as acquired angioedema, hereditary angioedema with normal C1 inhibitor (also known as hereditary angioedema type III), idiopathic angioedema, or recurrent angioedema associated with urticaria.

2. Participated in a prior lanadelumab study.
3. Dosed with an investigational drug or exposure to an investigational device within 4 weeks of screening.
4. Exposed to angiotensin-converting enzyme inhibitors or any estrogen-containing medications with systemic absorption (such as oral contraceptives or hormonal replacement therapy) within 4 weeks of screening.
5. Exposed to androgens (eg, stanozolol, danazol, oxandrolone, methyltestosterone, or testosterone) within 2 weeks of entering the run-in period.
6. Used long-term prophylactic therapy for hereditary angioedema (C1 inhibitor, attenuated androgens, or antifibrinolytics) within 2 weeks of entering the run-in period.
7. Used short-term prophylactic therapy for hereditary angioedema within 7 days of entering the run-in period. Short-term prophylaxis was defined as C1 inhibitor, attenuated androgens, or antifibrinolytics used to avoid angioedema complications from medically indicated procedures.
8. Any of the following liver function test abnormalities: alanine aminotransferase  $>3 \times$  upper limit of normal, or aspartate aminotransferase  $>3 \times$  upper limit of normal, or total bilirubin  $>2 \times$  upper limit of normal (unless the bilirubin elevation was a result of Gilbert's syndrome).
9. Pregnancy or breastfeeding.
10. Patient had any condition that, in the opinion of the investigator or sponsor, could have compromised their safety or compliance, precluded successful conduct of the study, or interfered with interpretation of the results (eg, history of substance abuse or dependence, significant pre-existing illness or other major comorbidity that the investigator considered could have confounded the interpretation of study results).

## **eMethods 2. Criteria for Investigator-Confirmed Hereditary Angioedema Attacks**

To be confirmed as a hereditary angioedema attack, the event must have had symptoms or signs consistent with an attack in  $\geq 1$  of the following locations:

- Peripheral angioedema: cutaneous swelling involving an extremity, the face, neck, torso, and/or genitourinary region
- Abdominal angioedema: abdominal pain, with or without abdominal distention, nausea, vomiting, or diarrhea
- Laryngeal angioedema: stridor, dyspnea, difficulty speaking, difficulty swallowing, throat tightening, or swelling of the tongue, palate, uvula, or larynx.

Despite the presence of these symptoms, the investigator may still have clinically determined that the event did not represent a hereditary angioedema attack if there were features that strongly refuted such a diagnosis. For example, the reported event was accompanied by symptoms that were not consistent with a hereditary angioedema attack (eg, urticaria), the reported event persisted well beyond the typical time course of a hereditary angioedema attack, or there was a likely alternate etiology for the event (eg, the patient's abdominal symptoms were attributable to a viral gastroenteritis outbreak in the household). To be counted as a unique attack distinct from the previous attack, the new symptoms must have occurred  $\geq 24$  hours after resolution of the symptoms from the prior attack.

### eMethods 3. Treatment Period Dosing Schedule

| Dose No. | Dose Day/Week   | Lanadelumab<br>150 mg<br>Every 4 Weeks | Lanadelumab<br>300 mg<br>Every 4 Weeks | Lanadelumab<br>300 mg<br>Every 2 Weeks | Placebo |
|----------|-----------------|----------------------------------------|----------------------------------------|----------------------------------------|---------|
| 1        | Day 0/week 0    | Lanadelumab                            | Lanadelumab                            | Lanadelumab                            | Placebo |
| 2        | Day 14/week 2   | Placebo                                | Placebo                                | Lanadelumab                            | Placebo |
| 3        | Day 28/week 4   | Lanadelumab                            | Lanadelumab                            | Lanadelumab                            | Placebo |
| 4        | Day 42/week 6   | Placebo                                | Placebo                                | Lanadelumab                            | Placebo |
| 5        | Day 56/week 8   | Lanadelumab                            | Lanadelumab                            | Lanadelumab                            | Placebo |
| 6        | Day 70/week 10  | Placebo                                | Placebo                                | Lanadelumab                            | Placebo |
| 7        | Day 84/week 12  | Lanadelumab                            | Lanadelumab                            | Lanadelumab                            | Placebo |
| 8        | Day 98/week 14  | Placebo                                | Placebo                                | Lanadelumab                            | Placebo |
| 9        | Day 112/week 16 | Lanadelumab                            | Lanadelumab                            | Lanadelumab                            | Placebo |
| 10       | Day 126/week 18 | Placebo                                | Placebo                                | Lanadelumab                            | Placebo |
| 11       | Day 140/week 20 | Lanadelumab                            | Lanadelumab                            | Lanadelumab                            | Placebo |
| 12       | Day 154/week 22 | Placebo                                | Placebo                                | Lanadelumab                            | Placebo |
| 13       | Day 168/week 24 | Lanadelumab                            | Lanadelumab                            | Lanadelumab                            | Placebo |
| –        | Day 182/week 26 | No dose                                | No dose                                | No dose                                | No dose |

Note: lanadelumab drug product was provided at a nominal concentration of 150-mg/mL solution. For each 300 mg dose of lanadelumab, each patient received a total of 2 mL, divided into 2 separate 1.0-mL subcutaneous injections of lanadelumab. For each 150 mg dose of lanadelumab, each patient received 2 separate 1.0-mL subcutaneous injections where 1 injection was lanadelumab and the other was placebo. For each placebo dose, each patient received 2 separate 1.0-mL subcutaneous injections of placebo.

## eMethods 4. Assessment of Attacks and Adverse Events

During the study, patients were instructed to contact the study site within 72 hours of the onset of an attack. Attack details were assessed by trained site personnel following HAE Attack Assessment and Reporting Procedures (see protocol in Supplement 1) and confirmed by the site investigator. Patients were asked to provide the following information when reporting an attack:

- Date and time symptoms of an attack were first experienced
- Description of symptoms experienced, including location(s)
- Impact on activity and whether any assistance or medical intervention was required, including hospitalizations or emergency department visits
- Any medications used to treat the attacks
- If the attack resolved, date and time the patient was no longer experiencing symptoms

Attack severity was rated (per the Division of Microbiology and Infectious Diseases Adult Toxicity Table<sup>1</sup>) as mild (transient or mild discomfort [ $<48$  hours]; no medical intervention/therapy required), moderate (mild to moderate limitation in activity; some assistance required; no or minimal medical intervention/therapy required), or severe (marked limitation in activity, assistance required; medical intervention/therapy required, hospitalizations possible), or life threatening (extreme limitation in activity, significant assistance required, significant medical intervention/therapy required, hospitalization or hospice care probable).<sup>1</sup>

Weekly communication between the patient and the study site was required to ensure capture of adverse events (AEs). AEs were collected over the entire treatment period. Although placebo injections were administered to the lanadelumab every 4 weeks groups to maintain blinding, AEs were captured and analyzed by treatment group regardless of injection type. AEs of special interest based on potential class effect of a monoclonal antibody or kallikrein inhibitor were captured. These included hypersensitivity reactions or disorders of coagulation (bleeding or hypercoagulation).

In this study, the primary endpoint (efficacy), HAE attacks, were also recorded as AEs. Thus, to avoid complicating the interpretation of safety, 2 mutually exclusive subgroups of AEs based on whether the AE was identified in electronic data capture (EDC) as a patient-reported HAE attack or not, were defined as follows:

1. Non-HAE attack reported AEs included the subset of AEs identified in EDC as not a reported HAE attack. Essentially, this was all AEs excluding HAE attack reported events. The severity of AEs were assessed according to tables from the Division of Microbiology and Infectious Diseases toxicity.<sup>1,2</sup>
2. HAE attack reported AEs included the subset of AEs identified in EDC as a reported HAE attack. This included investigator-confirmed HAE attacks. Severity of the angioedema attack was assessed in accordance with the criteria described in eMethods.<sup>2</sup>

### Reference

1. National Institute of Allergy and Infectious Diseases. Division of Microbiology and Infectious Diseases (DMID) adult toxicity table. November 2007. Draft <https://www.niaid.nih.gov/sites/default/files/dmidadulttox.pdf>. Accessed October 4, 2017.
2. National Institute of Allergy and Infectious Diseases. Division of Microbiology and Infectious Diseases (DMID) pediatric Toxicity Table. November 2007. Draft <https://www.niaid.nih.gov/sites/default/files/dmidpedtox.pdf>. Accessed October 4, 2017.

## eMethods 5. Statistical Analysis

The primary and secondary endpoints were tested in the following order:

1. Number of investigator-confirmed HAE attacks during treatment period (days 0-182)
2. Number investigator-confirmed HAE attacks requiring acute treatment during the treatment period (days 0-182)
3. Number of moderate or severe investigator-confirmed HAE attacks during the treatment period (days 0-182)
4. Number of investigator-confirmed HAE attacks occurring on day 14 after administration of study drug through day 182 (days 14-182).

The primary and secondary efficacy endpoints for each lanadelumab treatment group were compared with the placebo group using a generalized linear model for Poisson-distributed count data accounting for overdispersion; treatment group and normalized baseline attack rate were fixed effects and the logarithm of time (days) each patient was observed during the treatment period was an offset variable. The comparisons between dose groups and placebo were performed separately with equal weights for each test set at 1.67% significance level ( $\alpha/3$  2-sided, Bonferroni adjustment). Additional details can be found in the statistical analysis plan (Supplement 1).

A tipping point analysis was conducted to measure the potential effect of missing data on the reliability of the primary efficacy analysis. To assess the consistency of the treatment effect across subgroups, the primary efficacy analysis was performed by type of prior long-term prophylaxis used, run-in attack rate category, sex, and BMI. Additionally, the impact of region on the primary efficacy endpoint was assessed by including a binary covariate (US vs non-US) in the primary analysis model.

Exploratory binary and continuous endpoints for each lanadelumab treatment group were compared with the placebo group without adjustment for multiplicity, using Fisher's exact test and t-test, respectively. The observed portion of the treatment period was used for the analysis of binary outcomes.

Change in Angioedema Quality of Life Questionnaire total and domain scores from days 0-182 were compared across the lanadelumab dose regimens and placebo using analysis of covariance adjusting for baseline scores with pairwise *t* test using the Tukey-Kramer approximation. Chi-squared tests were used to assess the difference in the proportion of patients achieving a responder definition (minimal clinically important difference of  $-6$ ) in change in the total Angioedema Quality of Life Questionnaire score from days 0-182, across treatments vs placebo. Logistic regression models were fit to estimate treatment effects on achievement of responder definition, adjusting for other relevant covariates.

## eFigure1. Study Design

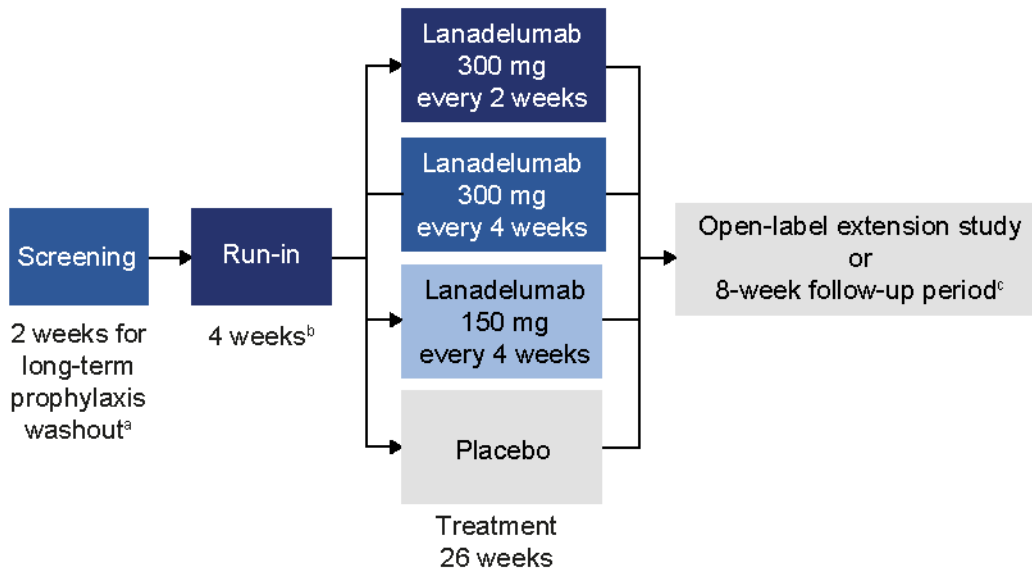

<sup>a</sup> Long-term prophylaxis washout only applicable to patients  $\geq 18$  years of age.

<sup>b</sup> Patients who experienced  $\geq 3$  investigator-confirmed attacks before the end of the 4 weeks may have exited the run-in period early and proceeded to enrollment and randomization. Patients without  $\geq 1$  investigator-confirmed attack after 4 weeks of run-in may have extended their run-in for another 4 weeks, during which time they needed to have  $\geq 2$  investigator-confirmed attacks to proceed to enrollment and randomization. To be eligible for enrollment, patients who had their run-in extended were required to complete the full 8-week run-in period before entering the treatment period. Patients who did not meet the minimum attack rate during the run-in period or were otherwise determined to be ineligible due to screening assessments were considered screen failures. Patients who were screen failures were not allowed to rescreen into the study.

<sup>c</sup> Eight-week follow-up period included assessments of safety, hereditary angioedema attacks, quality of life, and antidrug antibodies.



**eFigure 2. Mean HAE Attack Rates by Study Month and Treatment Group**

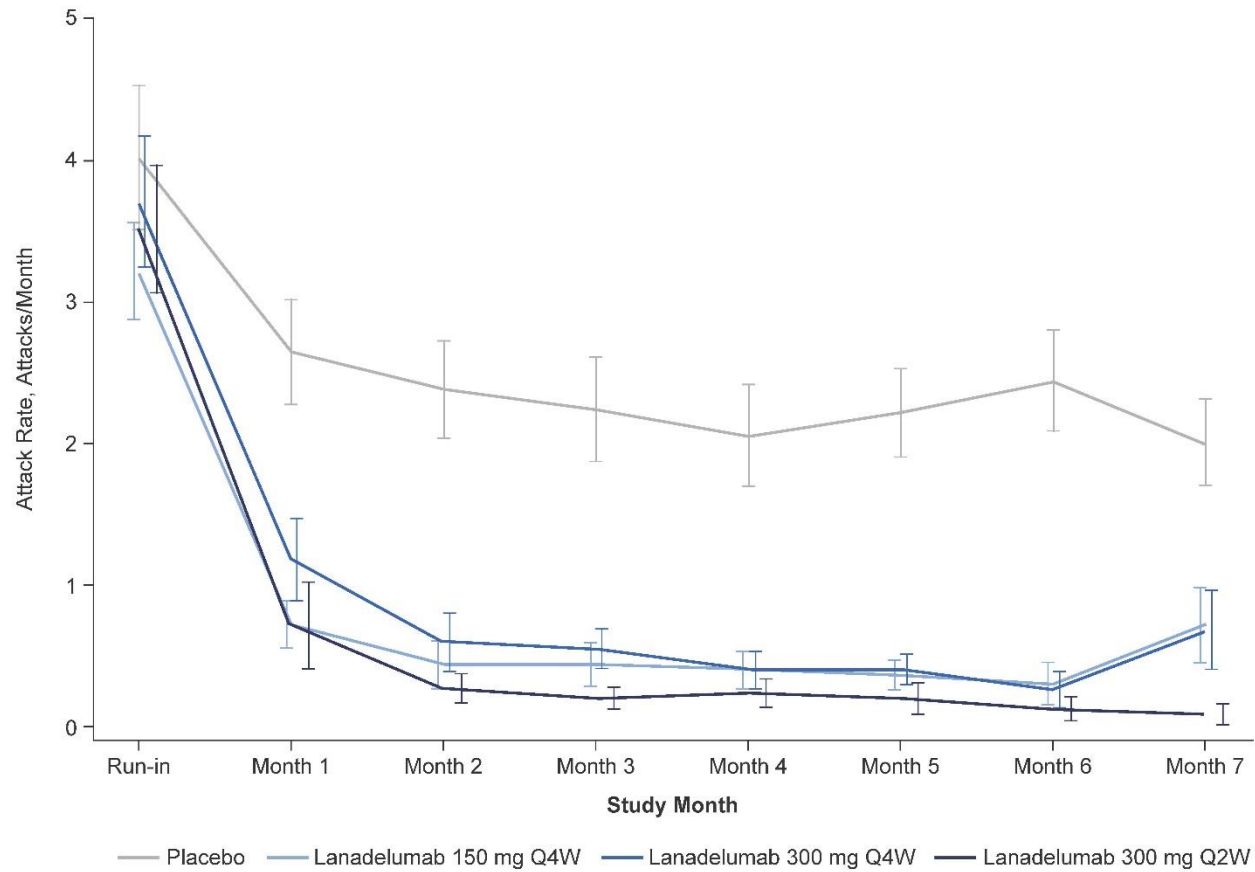

The mean (SE) investigator-confirmed HAE attack rate (attacks/month) by each study month (including the run-in period and 2 weeks after the last dose on Day 168 [6 months]) is shown.

**eTable 1. HELP Study Administrative Structure**

|                                                     |                                                                                                                                                                                                                                                                                                                                                                                                             |
|-----------------------------------------------------|-------------------------------------------------------------------------------------------------------------------------------------------------------------------------------------------------------------------------------------------------------------------------------------------------------------------------------------------------------------------------------------------------------------|
| <b>Publication Steering Committee</b>               | Aleena Banerji, MD (cochair)<br>Marcus Maurer, MD (cochair)<br>Jonathan A. Bernstein, MD<br>Marco Cicardi, MD<br>Hilary J. Longhurst, MD<br>Marc A. Riedl, MD<br>Bruce L. Zuraw, MD<br>Benjamin Miller, PharmD<br>Michael Craig, MSc<br>Jovanna Baptista, MS<br>Jennifer Schranz, MD                                                                                                                        |
| <b>Sponsor</b>                                      | Dyax Corp. (an indirect wholly owned subsidiary of Shire plc.)<br>300 Shire Way<br>Lexington, MA 02421                                                                                                                                                                                                                                                                                                      |
| <b>Clinical and Medical Monitoring</b>              | Jennifer Schranz, MD (Canada, Europe, Jordan, United States)<br>Vice President, Clinical Development, Shire<br>300 Shire Way<br>Lexington, MA 02421                                                                                                                                                                                                                                                         |
| <b>Clinical Program Support</b>                     | Ayman Ibrahim, MD<br>Clinical Development, Shire<br>300 Shire Way<br>Lexington, MA 02421                                                                                                                                                                                                                                                                                                                    |
| <b>Study Monitoring</b>                             | Rho, Inc. (United States)<br>6330 Quadrangle Drive<br>Chapel Hill, NC 27517<br><br>Triumpharma (Jordan)<br>07 Bldg., Al-Yarooty St. PO Box 2233<br>Amman 11941, Jordan<br><br>Red Maple Trials Incorporated (Canada)<br>2935 Conroy Road, Unit 110<br>Ottawa, ON K1G 6C6, Canada<br><br>Dyax Corp. (an indirect, wholly owned subsidiary of Shire plc.)<br>(Europe)<br>300 Shire Way<br>Lexington, MA 02421 |
| <b>Pharmacovigilance</b>                            | Shire<br>300 Shire Way<br>Lexington, MA 02421                                                                                                                                                                                                                                                                                                                                                               |
| <b>Central Clinical Laboratory</b>                  | Q Squared Solutions<br>1600 Terrell Mill Road SE, Suite 100<br>Marietta, GA 30067                                                                                                                                                                                                                                                                                                                           |
| <b>Antidrug Antibody Analysis</b>                   | Charles River Laboratory<br>8025 Lamont Avenue<br>Skokie, IL 60077                                                                                                                                                                                                                                                                                                                                          |
| <b>C1 Inhibitor Functional Assay and C4 Testing</b> | National Jewish Health<br>1400 Jackson Street<br>Denver, CO 80206                                                                                                                                                                                                                                                                                                                                           |
| <b>Data Management</b>                              | Shire                                                                                                                                                                                                                                                                                                                                                                                                       |

|                                                   |                                                                                                                                             |
|---------------------------------------------------|---------------------------------------------------------------------------------------------------------------------------------------------|
|                                                   | <p>300 Shire Way<br/>Lexington, MA 02421</p> <p>Rho, Inc. (United States)<br/>6330 Quadrangle Drive<br/>Chapel Hill, NC 27517</p>           |
| <b>Interactive Web-Based Randomization System</b> | <p>Rho, Inc. (United States)<br/>6330 Quadrangle Drive<br/>Chapel Hill, NC 27517</p>                                                        |
| <b>Biostatistics Analysis</b>                     | <p>Shire<br/>300 Shire Way<br/>Lexington, MA 02421</p> <p>Rho, Inc. (United States)<br/>6330 Quadrangle Drive<br/>Chapel Hill, NC 27517</p> |
| <b>Health-Related Quality of Life Analysis</b>    | <p>ICON Clinical Research Limited<br/>South County Business Park<br/>Leopardstown<br/>Dublin 18, Ireland</p>                                |

**eTable 2. Duration of Treatment for Patients Who Discontinued**

| <b>Planned Treatment Group</b> | <b>Patient</b> | <b>Completed the Study</b> | <b>Days in Treatment Period</b> | <b>Reason for Discontinuation</b> |
|--------------------------------|----------------|----------------------------|---------------------------------|-----------------------------------|
| Placebo                        | 1              | No                         | 28                              | Adverse event                     |
|                                | 2              | No                         | 43                              | Withdrawal by patient             |
|                                | 3              | No                         | 155                             | Withdrawal by patient             |
|                                | 4              | No                         | 13                              | Adverse event                     |
|                                | 5              | No                         | 189                             | Physician decision                |
|                                | 6              | No                         | 55                              | Withdrawal by patient             |
| Lanadelumab 150 mg Q4W         | 7              | No                         | 113                             | Withdrawal by patient             |
| Lanadelumab 300 mg Q4W         | 8              | No                         | 142                             | Adverse event                     |
|                                | 9              | No                         | 183                             | Lost to follow-up                 |
|                                | 10             | No                         | 73                              | Withdrawal by patient             |
| Lanadelumab 300 mg Q2W         | 11             | No                         | 35                              | Withdrawal by patient             |
|                                | 12             | No                         | 186                             | Withdrawal by patient             |

Abbreviations: Q2W, every 2 weeks; Q4W, every 4 weeks.

**eTable 3. Number of Patients by Duration of Run-in Period**

| <b>Duration of Run-in Period, Weeks, No. (%)</b> | <b>Lanadelumab<br/>150 mg<br/>Every 4 Weeks<br/>(n = 28)</b> | <b>Lanadelumab<br/>300 mg<br/>Every 4 Weeks<br/>(n = 29)</b> | <b>Lanadelumab<br/>300 mg<br/>Every 2 Weeks<br/>(n = 27)</b> | <b>Placebo<br/>(n = 41)</b> |
|--------------------------------------------------|--------------------------------------------------------------|--------------------------------------------------------------|--------------------------------------------------------------|-----------------------------|
| <4                                               | 12 (42.9)                                                    | 12 (41.4)                                                    | 11 (40.7)                                                    | 18 (43.9)                   |
| 4                                                | 9 (32.1)                                                     | 8 (27.6)                                                     | 7 (25.9)                                                     | 14 (34.1)                   |
| >4 to <8                                         | 7 (25.0)                                                     | 8 (27.6)                                                     | 9 (33.3)                                                     | 9 (22.0)                    |
| ≥8                                               | 0                                                            | 1 (3.4)                                                      | 0                                                            | 0                           |

**eTable 4. Number of Patients by Run-in Attack Rate Category**

| <b>Run-in Attack Rate Category, Attacks/mo, No. (%)</b> | <b>Lanadelumab<br/>150 mg<br/>Every 4 Weeks<br/>(n = 28)</b> | <b>Lanadelumab<br/>300 mg<br/>Every 4 Weeks<br/>(n = 29)</b> | <b>Lanadelumab<br/>300 mg<br/>Every 2 Weeks<br/>(n = 27)</b> | <b>Placebo<br/>(n = 41)</b> |
|---------------------------------------------------------|--------------------------------------------------------------|--------------------------------------------------------------|--------------------------------------------------------------|-----------------------------|
| 1 to <2                                                 | 10 (35.7)                                                    | 9 (31.0)                                                     | 7 (25.9)                                                     | 12 (29.3)                   |
| 2 to <3                                                 | 3 (10.7)                                                     | 5 (17.2)                                                     | 6 (22.2)                                                     | 8 (19.5)                    |
| 3 to <4                                                 | 7 (25.0)                                                     | 3 (10.3)                                                     | 7 (25.9)                                                     | 3 (7.3)                     |
| 4 to <5                                                 | 3 (10.7)                                                     | 1 (3.4)                                                      | 1 (3.7)                                                      | 4 (9.8)                     |
| 5 to <10                                                | 5 (17.9)                                                     | 10 (34.5)                                                    | 6 (22.2)                                                     | 12 (29.3)                   |
| 10 to <15                                               | 0                                                            | 1 (3.4)                                                      | 0                                                            | 2 (4.9)                     |

Run-in hereditary angioedema attack rate is calculated as the number of HAE attacks occurring in the run-in period divided by the number of days the patient contributed to the run-in period multiplied by 28 days.

**eTable 5. Primary Attack Location During Run-in and Treatment Period**

| <b>Location, No. (%), Attacks, No.</b> | <b>Lanadelumab<br/>150 mg<br/>Every 4 Weeks<br/>(n = 28)</b> | <b>Lanadelumab<br/>300 mg<br/>Every 4 Weeks<br/>(n = 29)</b> | <b>Lanadelumab<br/>300 mg<br/>Every 2 Weeks<br/>(n = 27)</b> | <b>Placebo<br/>(n = 41)</b> |
|----------------------------------------|--------------------------------------------------------------|--------------------------------------------------------------|--------------------------------------------------------------|-----------------------------|
| Run-in period                          |                                                              |                                                              |                                                              |                             |
| HAE attacks                            | 28 (100), 81                                                 | 29 (100), 77                                                 | 27 (100), 78                                                 | 41 (100), 127               |
| Abdominal                              | 20 (71.4), 29                                                | 19 (65.5), 30                                                | 14 (51.9), 21                                                | 27 (65.9), 61               |
| Laryngeal                              | 4 (14.3), 4                                                  | 1 (3.4), 1                                                   | 1 (3.7), 1                                                   | 0                           |
| Peripheral                             | 22 (78.6), 48                                                | 22 (75.9), 46                                                | 24 (88.9), 56                                                | 33 (80.5), 66               |
| Treatment period                       |                                                              |                                                              |                                                              |                             |
| HAE attacks                            | 17 (60.7), 84                                                | 20 (69.0), 105                                               | 15 (55.6), 46                                                | 40 (97.6), 572              |
| Abdominal                              | 14 (50.0), 38                                                | 17 (58.6), 78                                                | 9 (33.3), 23                                                 | 35 (85.4), 245              |
| Laryngeal                              | 1 (3.6), 3                                                   | 1 (3.4), 1                                                   | 3 (11.1), 3                                                  | 8 (19.5), 11                |
| Peripheral                             | 10 (35.7), 43                                                | 12 (41.4), 26                                                | 9 (33.3), 20                                                 | 37 (90.2), 316              |

Abbreviation: HAE, hereditary angioedema.

**eTable 6. Duration of Attacks**

| Location, No. (%), Attacks, No.              | Lanadelumab<br>150 mg<br>Every 4 Weeks<br>(n = 28) | Lanadelumab<br>300 mg<br>Every 4 Weeks<br>(n = 29) | Lanadelumab<br>300 mg<br>Every 2 Weeks<br>(n = 27) | Placebo<br>(n = 41) |
|----------------------------------------------|----------------------------------------------------|----------------------------------------------------|----------------------------------------------------|---------------------|
| Run-in period                                |                                                    |                                                    |                                                    |                     |
| No.                                          | 28                                                 | 29                                                 | 27                                                 | 41                  |
| HAE attack duration, mean (SD), h            | 38.9 (32.57)                                       | 28.0 (21.62)                                       | 35.6 (23.34)                                       | 31.2 (24.64)        |
| Mean HAE attack duration categories, No. (%) |                                                    |                                                    |                                                    |                     |
| <12 h                                        | 7 (25.0)                                           | 8 (27.6)                                           | 2 (7.4)                                            | 9 (22.0)            |
| 12 to 24 h                                   | 5 (17.9)                                           | 7 (24.1)                                           | 9 (33.3)                                           | 11 (26.8)           |
| >24 to 48 h                                  | 6 (21.4)                                           | 10 (34.5)                                          | 10 (37.0)                                          | 13 (31.7)           |
| >48 h                                        | 10 (35.7)                                          | 4 (13.8)                                           | 6 (22.2)                                           | 8 (19.5)            |
| Treatment period <sup>a</sup>                |                                                    |                                                    |                                                    |                     |
| No.                                          | 17                                                 | 20                                                 | 15                                                 | 40                  |
| HAE attack duration, mean (SD), h            | 35.6 (24.89)                                       | 26.0 (21.10)                                       | 26.6 (22.73)                                       | 33.5 (23.41)        |
| Difference vs placebo (95% CI), h            | 2.1 (-12.4 to 16.6)                                | -7.4 (-19.5 to 4.7)                                | -6.9 (-21.2 to 7.4)                                | -                   |
| <i>P</i> value <sup>b</sup>                  | .770                                               | .222                                               | .330                                               |                     |
| Mean HAE attack duration categories, No. (%) |                                                    |                                                    |                                                    |                     |
| No attacks                                   | 11 (39.3)                                          | 9 (31.0)                                           | 12 (44.4)                                          | 1 (2.4)             |
| <12 h                                        | 4 (14.3)                                           | 6 (20.7)                                           | 5 (18.5)                                           | 8 (19.5)            |
| 12 to 24 h                                   | 2 (7.1)                                            | 6 (20.7)                                           | 3 (11.1)                                           | 10 (24.4)           |
| >24 to 48 h                                  | 7 (25.0)                                           | 6 (20.7)                                           | 4 (14.8)                                           | 12 (29.3)           |
| >48 h                                        | 4 (14.3)                                           | 2 (6.9)                                            | 3 (11.1)                                           | 10 (24.4)           |

Mean attack duration is the average for each patient's attacks.

<sup>a</sup> Includes only patients with attacks.

<sup>b</sup> *P* value from t-test.



**eTable 7. Summary of On-Demand Treatment for Attacks and the Use of Supportive Therapies for Symptoms**

| Patients, No. (%), Attacks, No.          | Lanadelumab<br>150 mg<br>Every 4 Weeks<br>(n = 28) | Lanadelumab<br>300 mg<br>Every 4 Weeks<br>(n = 29) | Lanadelumab<br>300 mg<br>Every 2 Weeks<br>(n = 27) | Lanadelumab Total<br>(n = 84) | Placebo        |
|------------------------------------------|----------------------------------------------------|----------------------------------------------------|----------------------------------------------------|-------------------------------|----------------|
|                                          |                                                    |                                                    |                                                    |                               | (n = 41)       |
| Run-in period                            |                                                    |                                                    |                                                    |                               |                |
| Total no. of attacks                     | 28 (100), 81                                       | 29 (100), 77                                       | 27 (100), 78                                       | 84 (100), 236                 | 41 (100), 127  |
| On-demand medication use                 |                                                    |                                                    |                                                    |                               |                |
| Any on-demand medication                 | 25 (89.3), 61                                      | 27 (93.1), 69                                      | 23 (85.2), 67                                      | 75 (89.3), 197                | 37 (90.2), 111 |
| Ecallantide                              | 3 (10.7), 5                                        | 6 (20.7), 8                                        | 1 (3.7), 3                                         | 10 (11.9), 16                 | 2 (4.9), 2     |
| Icatibant                                | 13 (46.4), 28                                      | 13 (44.8), 41                                      | 13 (48.1), 32                                      | 39 (46.4), 101                | 22 (53.7), 38  |
| Nanofiltered/plasma-derived C1 inhibitor | 12 (42.9), 32                                      | 14 (48.3), 28                                      | 12 (44.4), 34                                      | 38 (45.2), 94                 | 22 (53.7), 77  |
| Nanofiltered C1 inhibitor                | 5 (17.9), 10                                       | 5 (17.2), 9                                        | 6 (22.2), 12                                       | 16 (19.0), 31                 | 6 (14.6), 24   |
| Plasma-derived C1 inhibitor              | 8 (28.6), 22                                       | 9 (31.0), 19                                       | 6 (22.2), 22                                       | 23 (27.4), 63                 | 16 (39.0), 53  |
| Recombinant C1 inhibitor                 | 0                                                  | 1 (3.4), 1                                         | 1 (3.7), 2                                         | 2 (2.4), 3                    | 0              |
| Fresh frozen plasma                      | 0                                                  | 0                                                  | 0                                                  | 0                             | 1 (2.4), 1     |
| Supportive treatment                     |                                                    |                                                    |                                                    |                               |                |
| Any supportive treatment                 | 7 (25.0), 12                                       | 2 (6.9), 2                                         | 4 (14.8), 7                                        | 13 (15.5), 21                 | 5 (12.2), 6    |
| Intravenous fluids                       | 1 (3.6), 1                                         | 1 (3.4), 1                                         | 0                                                  | 2 (2.4), 2                    | 0              |
| Pain medication                          | 5 (17.9), 9                                        | 2 (6.9), 2                                         | 2 (7.4), 5                                         | 9 (10.7), 16                  | 3 (7.3), 4     |
| Oxygen                                   | 0                                                  | 0                                                  | 0                                                  | 0                             | 0              |
| Antiemetic                               | 1 (3.6), 1                                         | 1 (3.4), 1                                         | 0                                                  | 2 (2.4), 2                    | 1 (2.4), 2     |
| Other                                    | 3 (10.7), 4                                        | 0                                                  | 2 (7.4), 2                                         | 5 (6.0), 6                    | 3 (7.3), 3     |
| Treatment period (days 0-182)            |                                                    |                                                    |                                                    |                               |                |
| Total no. of attacks                     | 17 (60.7), 84                                      | 20 (69.0), 105                                     | 15 (55.6), 46                                      | 52 (61.9), 235                | 40 (97.6), 572 |
| On-demand medication use                 |                                                    |                                                    |                                                    |                               |                |
| Any on-demand medication                 | 14 (50.0), 55                                      | 16 (55.2), 87                                      | 12 (44.4), 38                                      | 42 (50.0), 180                | 40 (97.6), 506 |
| Ecallantide                              | 1 (3.6), 1                                         | 6 (20.7), 18                                       | 0                                                  | 7 (8.3), 19                   | 5 (12.2), 12   |
| Icatibant                                | 9 (32.1), 25                                       | 11 (37.9), 69                                      | 10 (37.0), 20                                      | 30 (35.7), 114                | 27 (65.9), 172 |
| Nanofiltered/plasma-derived C1 inhibitor | 7 (25.0), 31                                       | 4 (13.8), 7                                        | 6 (22.2), 26                                       | 17 (20.2), 64                 | 27 (65.9), 362 |
| Nanofiltered C1 inhibitor                | 3 (10.7), 10                                       | 2 (6.9), 2                                         | 4 (14.8), 12                                       | 9 (10.7), 24                  | 8 (19.5), 141  |

|                             |              |            |              |               |                |
|-----------------------------|--------------|------------|--------------|---------------|----------------|
| Plasma-derived C1 inhibitor | 5 (17.9), 21 | 2 (6.9), 5 | 3 (11.1), 14 | 10 (11.9), 40 | 21 (51.2), 223 |
| Recombinant C1 inhibitor    | 0            | 1 (3.4), 1 | 0            | 1 (1.2), 1    | 0              |
| Fresh frozen plasma         | 0            | 0          | 0            | 0             | 0              |
| Supportive treatment        |              |            |              |               |                |
| Any supportive treatment    | 6 (21.4), 16 | 2 (6.9), 8 | 1 (3.7), 2   | 9 (10.7), 26  | 13 (31.7), 30  |
| Intravenous fluids          | 0            | 1 (3.4), 1 | 1 (3.7), 1   | 2 (2.4), 2    | 2 (4.9), 2     |
| Pain medication             | 5 (17.9), 15 | 2 (6.9), 8 | 0            | 7 (8.3), 23   | 10 (24.4), 20  |
| Oxygen                      | 0            | 0          | 0            | 0             | 0              |
| Antiemetic                  | 4 (14.3), 4  | 1 (3.4), 1 | 1 (3.7), 1   | 6 (7.1), 6    | 3 (7.3), 8     |
| Other                       | 2 (7.1), 2   | 1 (3.4), 1 | 1 (3.7), 1   | 4 (4.8), 4    | 4 (9.8), 7     |

Patients may have used >1 on-demand treatment and/or supportive treatment for a single attack.

**eTable 8. Efficacy Outcomes by Subgroups**

| Endpoint                                                   | Lanadelumab<br>150 mg<br>Every 4 Weeks<br>(n = 28) | Lanadelumab<br>300 mg<br>Every 4 Weeks<br>(n = 29) | Lanadelumab<br>300 mg<br>Every 2 Weeks<br>(n = 27) | Placebo<br>(n = 41) |
|------------------------------------------------------------|----------------------------------------------------|----------------------------------------------------|----------------------------------------------------|---------------------|
| By long-term prophylaxis use before study entry            |                                                    |                                                    |                                                    |                     |
| Long-term prophylaxis                                      |                                                    |                                                    |                                                    |                     |
| n                                                          | 12                                                 | 20                                                 | 14                                                 | 24                  |
| Attacks/mo, mean (95% CI) <sup>a,b</sup>                   | 0.48 (0.25 to 0.92)                                | 0.59 (0.38 to 0.92)                                | 0.31 (0.16 to 0.62)                                | 2.15 (1.70 to 2.71) |
| Difference from placebo, mean (95% CI) <sup>c</sup>        | -1.67 (-2.26 to -1.07)                             | -1.56 (-2.12 to -1.00)                             | -1.84 (-2.37 to -1.30)                             | -                   |
| P value                                                    | < .001                                             | < .001                                             | < .001                                             |                     |
| Rate ratio relative to placebo, mean (95% CI) <sup>b</sup> | 0.22 (0.11 to 0.45)                                | 0.27 (0.17 to 0.45)                                | 0.14 (0.07 to 0.30)                                | -                   |
| P value                                                    | < .001                                             | < .001                                             | < .001                                             |                     |
| No long-term prophylaxis                                   |                                                    |                                                    |                                                    |                     |
| n                                                          | 16                                                 | 9                                                  | 13                                                 | 17                  |
| Attacks/mo, mean (95% CI) <sup>a,b</sup>                   | 0.44 (0.24 to 0.81)                                | 0.39 (0.18 to 0.87)                                | 0.20 (0.07 to 0.60)                                | 1.76 (1.30 to 2.38) |
| Difference from placebo, mean (95% CI) <sup>c</sup>        | -1.32 (-1.90 to -0.73)                             | -1.37 (-1.96 to -0.78)                             | -1.56 (-2.14 to -0.98)                             | -                   |
| P value                                                    | < .001                                             | < .001                                             | < .001                                             |                     |
| Rate ratio relative to placebo, mean (95% CI) <sup>b</sup> | 0.25 (0.13 to 0.49)                                | 0.22 (0.10 to 0.51)                                | 0.11 (0.04 to 0.36)                                | -                   |
| P value                                                    | < .001                                             | < .001                                             | < .001                                             |                     |
| By run-in period attack rate group                         |                                                    |                                                    |                                                    |                     |
| 1 to <2 attacks/mo                                         |                                                    |                                                    |                                                    |                     |
| n                                                          | 10                                                 | 9                                                  | 7                                                  | 12                  |
| Attacks/mo, mean (95% CI) <sup>a,b</sup>                   | 0.46 (0.25 to 0.85)                                | 0.18 (0.07 to 0.51)                                | 0.07 (0.01 to 0.47)                                | 0.94 (0.63 to 1.41) |
| Difference from placebo, mean (95% CI) <sup>c</sup>        | -0.48 (-0.95 to -0.01)                             | -0.76 (-1.18 to -0.33)                             | -0.87 (-1.28 to -0.47)                             | -                   |
| P value                                                    | .046                                               | < .001                                             | < .001                                             |                     |
| Rate ratio relative to placebo, mean (95% CI) <sup>b</sup> | 0.49 (0.24 to 1.02)                                | 0.20 (0.07 to 0.58)                                | 0.07 (0.01 to 0.52)                                | -                   |
| P value                                                    | .055                                               | .003                                               | .009                                               |                     |
| 2 to <3 attacks/mo                                         |                                                    |                                                    |                                                    |                     |
| n                                                          | 3                                                  | 5                                                  | 6                                                  | 8                   |

|                                                            |                        |                        |                        |                     |
|------------------------------------------------------------|------------------------|------------------------|------------------------|---------------------|
| Attacks/mo, mean (95% CI) <sup>a,b</sup>                   | 0.20 (0.05 to 0.81)    | 0.49 (0.25 to 0.99)    | 0.25 (0.10 to 0.61)    | 2.14 (1.64 to 2.80) |
| Difference from placebo, mean (95% CI) <sup>c</sup>        | -1.94 (-2.58 to -1.30) | -1.65 (-2.31 to -0.99) | -1.89 (-2.50 to -1.28) | -                   |
| <i>P</i> value                                             | < .001                 | < .001                 | < .001                 |                     |
| Rate ratio relative to placebo, mean (95% CI) <sup>b</sup> | 0.09 (0.02 to 0.39)    | 0.23 (0.11 to 0.48)    | 0.12 (0.05 to 0.30)    | -                   |
| <i>P</i> value                                             | .001                   | < .001                 | < .001                 |                     |
| ≥3 attacks/mo                                              |                        |                        |                        |                     |
| n                                                          | 15                     | 15                     | 14                     | 21                  |
| Attacks/mo, mean (95% CI) <sup>a,b</sup>                   | 0.57 (0.31 to 1.06)    | 0.79 (0.49 to 1.29)    | 0.38 (0.18 to 0.81)    | 2.71 (2.12 to 3.46) |
| Difference from placebo, mean (95% CI) <sup>c</sup>        | -2.14 (-2.90 to -1.38) | -1.92 (-2.67 to -1.17) | -2.33 (-3.05 to -1.61) | -                   |
| <i>P</i> value                                             | < .001                 | < .001                 | < .001                 |                     |
| Rate ratio relative to placebo, mean (95% CI) <sup>b</sup> | 0.21 (0.11 to 0.41)    | 0.29 (0.17 to 0.50)    | 0.14 (0.06 to 0.31)    | -                   |
| <i>P</i> value                                             | < .001                 | < .001                 | < .001                 |                     |
| By Sex                                                     |                        |                        |                        |                     |
| Female                                                     |                        |                        |                        |                     |
| n                                                          | 20                     | 19                     | 15                     | 34                  |
| Attacks/mo, mean (95% CI) <sup>a,b</sup>                   | 0.42 (0.25 to 0.71)    | 0.59 (0.38 to 0.90)    | 0.28 (0.13 to 0.58)    | 1.94 (1.59 to 2.36) |
| Difference from placebo, mean (95% CI) <sup>c</sup>        | -1.52 (-1.96 to -1.08) | -1.35 (-1.79 to -0.91) | -1.66 (-2.09 to -1.23) | -                   |
| <i>P</i> value                                             | < .001                 | < .001                 | < .001                 |                     |
| Rate ratio relative to placebo, mean (95% CI) <sup>b</sup> | 0.22 (0.12 to 0.38)    | 0.30 (0.19 to 0.48)    | 0.14 (0.07 to 0.30)    | -                   |
| <i>P</i> value                                             | < .001                 | < .001                 | < .001                 |                     |
| Male                                                       |                        |                        |                        |                     |
| n                                                          | 8                      | 10                     | 12                     | 7                   |
| Attacks/mo, mean (95% CI) <sup>a,b</sup>                   | 0.57 (0.25 to 1.26)    | 0.39 (0.16 to 0.93)    | 0.21 (0.08 to 0.59)    | 2.20 (1.40 to 3.45) |
| Difference from placebo, mean (95% CI) <sup>c</sup>        | -1.64 (-2.71 to -0.57) | -1.81 (-2.86 to -0.77) | -1.99 (-2.99 to -0.98) | -                   |
| <i>P</i> value                                             | .003                   | < .001                 | < .001                 |                     |
| Rate ratio relative to placebo, mean (95% CI) <sup>b</sup> | 0.26 (0.10 to 0.63)    | 0.18 (0.07 to 0.47)    | 0.10 (0.03 to 0.29)    | -                   |
| <i>P</i> value                                             | .003                   | < .001                 | < .001                 |                     |

|                                                            |                        |                        |                        |                     |
|------------------------------------------------------------|------------------------|------------------------|------------------------|---------------------|
| By BMI group <sup>d</sup>                                  |                        |                        |                        |                     |
| 18.5 to <25 kg/m <sup>2</sup>                              |                        |                        |                        |                     |
| n                                                          | 11                     | 6                      | 6                      | 12                  |
| Attacks/mo, mean (95% CI) <sup>a,b</sup>                   | 0.33 (0.14 to 0.79)    | 0.24 (0.06 to 0.92)    | 0.11 (0.01 to 0.88)    | 1.76 (1.20 to 2.60) |
| Difference from placebo, mean (95% CI) <sup>c</sup>        | -1.43 (-2.16 to -0.70) | -1.52 (-2.27 to -0.77) | -1.66 (-2.37 to -0.94) | -                   |
| <i>P</i> value                                             | <i>P</i> < .001        | <i>P</i> < .001        | <i>P</i> < .001        |                     |
| Rate ratio relative to placebo, mean (95% CI) <sup>b</sup> | 0.19 (0.07 to 0.48)    | 0.14 (0.04 to 0.55)    | 0.06 (0.01 to 0.52)    | -                   |
| <i>P</i> value                                             | < .001                 | .005                   | .010                   |                     |
| 25 to <30 kg/m <sup>2</sup>                                |                        |                        |                        |                     |
| n                                                          | 8                      | 12                     | 10                     | 13                  |
| Attacks/mo, mean (95% CI) <sup>a,b</sup>                   | 0.55 (0.25 to 1.23)    | 0.68 (0.38 to 1.21)    | 0.36 (0.15 to 0.83)    | 2.29 (1.67 to 3.13) |
| Difference from placebo, mean (95% CI) <sup>c</sup>        | -1.74 (-2.58 to -0.90) | -1.61 (-2.41 to -0.81) | -1.93 (-2.69 to -1.17) | -                   |
| <i>P</i> value                                             | < .001                 | < .001                 | < .001                 |                     |
| Rate ratio relative to placebo, mean (95% CI) <sup>b</sup> | 0.24 (0.10 to 0.57)    | 0.30 (0.16 to 0.56)    | 0.16 (0.07 to 0.38)    | -                   |
| <i>P</i> value                                             | .001                   | <i>P</i> < .001        | <i>P</i> < .001        |                     |
| 18.5 to ≥30 kg/m <sup>2</sup>                              |                        |                        |                        |                     |
| n                                                          | 8                      | 8                      | 9                      | 11                  |
| Attacks/mo, mean (95% CI) <sup>a,b</sup>                   | 0.69 (0.36 to 1.35)    | 0.62 (0.33 to 1.18)    | 0.23 (0.08 to 0.67)    | 2.35 (1.68 to 3.29) |
| Difference from placebo, mean (95% CI) <sup>c</sup>        | -1.66 (-2.57 to -0.74) | -1.73 (-2.59 to -0.86) | -2.12 (-2.94 to -1.29) | -                   |
| <i>P</i> value                                             | <i>P</i> < .001        | <i>P</i> < .001        | <i>P</i> < .001        |                     |
| Rate ratio relative to placebo, mean (95% CI) <sup>b</sup> | 0.30 (0.14 to 0.62)    | 0.26 (0.13 to 0.54)    | 0.10 (0.03 to 0.30)    | -                   |
| <i>P</i> value                                             | .001                   | <i>P</i> < .001        | <i>P</i> < .001        |                     |

Abbreviation: BMI, body mass index.

<sup>a</sup> Attack rates are presented as a model-based mean attacks/4 weeks.

<sup>b</sup> Results are from a Poisson regression model accounting for overdispersion; treatment group and normalized baseline attack rate were fixed effects and the logarithm of time (days) each patient was observed during the treatment period was an offset variable. All *P* values (Wald test) reported vs placebo and are unadjusted.

<sup>c</sup> Estimated from a nonlinear function of the model parameters. All *P* values (Wald test) reported vs placebo.

<sup>d</sup> Only 1 patient was in the <18.5 kg/m<sup>2</sup> BMI group, and is not presented here.

**eTable 9. Tipping Point Analysis**

|                                             | <b>Lanadelumab<br/>150 mg<br/>Every 4 Weeks<br/>(n = 28)</b> | <b>Lanadelumab<br/>300 mg<br/>Every 4 Weeks<br/>(n = 29)</b> | <b>Lanadelumab<br/>300 mg<br/>Every 2 Weeks<br/>(n = 27)</b> | <b>Placebo<br/>(n = 41)</b> |
|---------------------------------------------|--------------------------------------------------------------|--------------------------------------------------------------|--------------------------------------------------------------|-----------------------------|
| Patients missing data, No. (%) <sup>a</sup> | 1 (3.6)                                                      | 2 (6.9)                                                      | 2 (7.4)                                                      | 5 (12.2)                    |
| Value of the tipping point $\delta^b$       | 27                                                           | 22                                                           | 35                                                           |                             |
| Rate ratio vs placebo (95% CI) <sup>c</sup> | 0.400 (0.186-0.862)                                          | 0.495 (0.277-0.886)                                          | 0.317 (0.121-0.831)                                          |                             |
| <i>P</i> value                              | .019                                                         | .018                                                         | .020                                                         |                             |

See the statistical analysis plan (Supplement 1) for details on the methodology used for the analysis. Using the multiple imputation approach, patients who did not complete the treatment period, with the early discontinuation day before day 182, had their hereditary angioedema attack data for the missing part of the study randomly imputed using the primary analysis model and an assumption that events occur with the same underlying rate within an individual. Next, a multiplication factor with progressively more conservative assumptions on higher post-dropout attack rates was applied to patients treated with lanadelumab. The analysis indicated that the post-discontinuation HAE attack rate would need to be 27, 22, and 35 times as high as during the study (ie, the tipping points), respectively, for the 3 lanadelumab treatment groups, to reverse the significance finding over placebo (type I error rate equals 0.05/3=0.0167 for each comparison). The high level of implausibility of the tipping points strongly supports the robustness of the primary efficacy results.

<sup>a</sup>Patients missing data are patients who did not complete the treatment period (days 0-182).

<sup>b</sup>The value of  $\delta$  represents a multiplicative effect on the imputed rate of attacks for patients who are missing data during the treatment period. The tipping point is the value of  $\delta$  at which the results of the study comparison are reversed and the *P* value is  $\geq 0.0167$  ( $\alpha/3$ ) for the treatment group vs placebo.

<sup>c</sup>The rate ratios are the estimates from the Poisson model after combining the estimates from the 1000 simulations using Rubin's rules.

**eTable 10. Number of Patients by Geographical Region**

| <b>Region, No. patients (%)</b> | <b>Lanadelumab<br/>150 mg<br/>Every 4 Weeks<br/>(n = 28)</b> | <b>Lanadelumab<br/>300 mg<br/>Every 4 Weeks<br/>(n = 29)</b> | <b>Lanadelumab<br/>300 mg<br/>Every 2 Weeks<br/>(n = 27)</b> | <b>Lanadelumab<br/>total<br/>(n = 84)</b> | <b>Placebo<br/>(n = 41)</b> |
|---------------------------------|--------------------------------------------------------------|--------------------------------------------------------------|--------------------------------------------------------------|-------------------------------------------|-----------------------------|
| United States                   | 20 (71.4)                                                    | 23 (79.3)                                                    | 18 (66.7)                                                    | 61 (72.6)                                 | 25 (61.0)                   |
| Canada                          | 1 (3.6)                                                      | 1 (3.4)                                                      | 2 (7.4)                                                      | 4 (4.8)                                   | 3 (7.3)                     |
| Europe                          | 6 (21.4)                                                     | 4 (13.8)                                                     | 7 (25.9)                                                     | 17 (20.2)                                 | 12 (29.3)                   |
| Jordan                          | 1 (3.6)                                                      | 1 (3.4)                                                      | 0                                                            | 2 (2.4)                                   | 1 (2.4)                     |

**eTable 11. Mean Number of Attacks Days 0-182, Adjusted by Geographical Region**

|                                              | <b>Lanadelumab<br/>150 mg<br/>Every 4 Weeks<br/>(n = 28)</b> | <b>Lanadelumab<br/>300 mg<br/>Every 4 Weeks<br/>(n = 29)</b> | <b>Lanadelumab<br/>300 mg<br/>Every 2 Weeks<br/>(n = 27)</b> | <b>Placebo<br/>(n = 41)</b> |
|----------------------------------------------|--------------------------------------------------------------|--------------------------------------------------------------|--------------------------------------------------------------|-----------------------------|
| Mean number of attacks days 0-182            |                                                              |                                                              |                                                              |                             |
| Attacks/mo (95% CI)                          | 0.49 (0.32-0.75)                                             | 0.55 (0.37-0.81)                                             | 0.26 (0.15-0.47)                                             | 1.99 (1.65-2.39)            |
| Difference from placebo (95% CI), attacks/mo | -1.50 (-1.92 to -1.08)                                       | -1.44 (-1.85 to -1.03)                                       | -1.72 (-2.11 to -1.33)                                       | -                           |
| <i>P</i> value                               | < .001                                                       | < .001                                                       | < .001                                                       |                             |
| Rate ratio relative to placebo (95% CI)      | 0.25 (0.15-0.39)                                             | 0.27 (0.18-0.42)                                             | 0.13 (0.07-0.24)                                             | -                           |
| <i>P</i> value                               | < .001                                                       | < .001                                                       | < .001                                                       |                             |

Attack rates are model-based mean attacks/month, with a month defined as 4 weeks. Results are from a Poisson regression model accounting for overdispersion; treatment group and normalized baseline attack rate were fixed effects and the logarithm of time (days) each patient was observed during the treatment period was an offset variable. Region (US versus non-US) was included as a categorical covariate. All *P* values reported vs placebo.



**eTable 12. Listing of Patients Who Discontinued During Treatment Due to Adverse Events**

| <b>Patient Number</b> | <b>Treatment Group</b>           | <b>Reason for Discontinuation</b>                                                                                  |
|-----------------------|----------------------------------|--------------------------------------------------------------------------------------------------------------------|
| 1                     | Lanadelumab 300 mg every 4 weeks | Severe related treatment-emergent adverse events (elevated aspartate transaminase/alanine transaminase) on day 139 |
| 2                     | Placebo                          | Related treatment-emergent adverse event (tension headache) of moderate severity on day 1 (9 hours)                |
| 3                     | Placebo                          | Not related moderate hereditary angioedema attack on day 12                                                        |

Patient 1 was a 43-year-old male with hereditary angioedema type I (diagnosed at 12 years of age) with a baseline history of obesity, hyperlipidemia, diabetes mellitus, fatty liver, and hypertension. The patient withdrew due to isolated, asymptomatic, and transient elevation of aspartate transaminase (143 U/L) and alanine transaminase (140 U/L) classified as related and severe on day 139. Concomitant suspect medications included metoprolol, sitagliptin/metformin, metformin, icatibant, and a 5-day history of acetaminophen use for headache immediately before the observed aspartate transaminase/alanine transaminase elevation. Aspartate transaminase (45 U/L) and alanine transaminase (73 U/L) returned or trended to normal range on last available contact.

**eTable 13. Summary of Serious Treatment-Emergent Adverse Events**

| <b>Event, No. (%)</b>                        | <b>Lanadelumab<br/>150 mg<br/>Every 4 Weeks<br/>(n = 28)</b> | <b>Lanadelumab<br/>300 mg<br/>Every 4 Weeks<br/>(n = 29)</b> | <b>Lanadelumab<br/>300 mg<br/>Every 2 Weeks<br/>(n = 27)</b> | <b>Lanadelumab<br/>Total<br/>(n = 84)</b> | <b>Placebo<br/>(n = 41)</b> |
|----------------------------------------------|--------------------------------------------------------------|--------------------------------------------------------------|--------------------------------------------------------------|-------------------------------------------|-----------------------------|
| Any serious treatment-emergent adverse event | 0                                                            | 3 (10.3)                                                     | 1 (3.7)                                                      | 4 (4.8)                                   | 0                           |
| Catheter site infection                      | 0                                                            | 0                                                            | 1 (3.7)                                                      | 1 (1.2)                                   | 0                           |
| Pyelonephritis                               | 0                                                            | 1 (3.4)                                                      | 0                                                            | 1 (1.2)                                   | 0                           |
| Meniscus injury                              | 0                                                            | 1 (3.4)                                                      | 0                                                            | 1 (1.2)                                   | 0                           |
| Bipolar II disorder                          | 0                                                            | 1 (3.4)                                                      | 0                                                            | 1 (1.2)                                   | 0                           |

**eTable 14. Summary of Activated Partial Thromboplastin Time**

| <b>Time Point, No.<br/>Category, No. (%)</b> | <b>Lanadelumab<br/>150 mg<br/>Every 4 Weeks<br/>(n = 28)</b> | <b>Lanadelumab<br/>300 mg<br/>Every 4 Weeks<br/>(n = 29)</b> | <b>Lanadelumab<br/>300 mg<br/>Every 2 Weeks<br/>(n = 27)</b> | <b>Lanadelumab<br/>Total<br/>(n = 84)</b> | <b>Placebo<br/>(n = 41)</b> |
|----------------------------------------------|--------------------------------------------------------------|--------------------------------------------------------------|--------------------------------------------------------------|-------------------------------------------|-----------------------------|
| Day 0/week 0                                 | 28                                                           | 29                                                           | 27                                                           | 84                                        | 41                          |
| Low, clinically significant                  | 0                                                            | 0                                                            | 0                                                            | 0                                         | 0                           |
| Low, not clinically significant              | 0                                                            | 1 (3.4)                                                      | 1 (3.7)                                                      | 2 (2.4)                                   | 0                           |
| Normal                                       | 28 (100)                                                     | 28 (96.6)                                                    | 25 (92.6)                                                    | 81 (96.4)                                 | 40 (97.6)                   |
| High, not clinically significant             | 0                                                            | 0                                                            | 1 (3.7)                                                      | 1 (1.2)                                   | 1 (2.4)                     |
| High, clinically significant                 | 0                                                            | 0                                                            | 0                                                            | 0                                         | 0                           |
| Day 28/week 4                                | 27                                                           | 29                                                           | 26                                                           | 82                                        | 39                          |
| Low, clinically significant                  | 0                                                            | 0                                                            | 0                                                            | 0                                         | 0                           |
| Low, not clinically significant              | 0                                                            | 0                                                            | 0                                                            | 0                                         | 0                           |
| Normal                                       | 27 (100)                                                     | 27 (93.1)                                                    | 17 (65.4)                                                    | 71 (86.6)                                 | 38 (97.4)                   |
| High, not clinically significant             | 0                                                            | 2 (6.9)                                                      | 7 (26.9)                                                     | 9 (11.0)                                  | 1 (2.6)                     |
| High, clinically significant                 | 0                                                            | 0                                                            | 2 (7.7)                                                      | 2 (2.4)                                   | 0                           |
| Day 56/week 8                                | 26                                                           | 29                                                           | 25                                                           | 80                                        | 37                          |
| Low, clinically significant                  | 0                                                            | 0                                                            | 0                                                            | 0                                         | 0                           |
| Low, not clinically significant              | 0                                                            | 0                                                            | 0                                                            | 0                                         | 0                           |
| Normal                                       | 26 (100)                                                     | 25 (86.2)                                                    | 21 (84.0)                                                    | 72 (90.0)                                 | 35 (94.6)                   |
| High, not clinically significant             | 0                                                            | 4 (13.8)                                                     | 4 (16.0)                                                     | 8 (10.0)                                  | 1 (2.7)                     |
| High, clinically significant                 | 0                                                            | 0                                                            | 0                                                            | 0                                         | 1 (2.7)                     |
| Day 98/week 14                               | 27                                                           | 27                                                           | 22                                                           | 76                                        | 35                          |
| Low, clinically significant                  | 0                                                            | 0                                                            | 0                                                            | 0                                         | 0                           |
| Low, not clinically significant              | 0                                                            | 0                                                            | 0                                                            | 0                                         | 0                           |
| Normal                                       | 27 (100)                                                     | 24 (88.9)                                                    | 17 (77.3)                                                    | 68 (89.5)                                 | 32 (91.4)                   |
| High, not clinically significant             | 0                                                            | 3 (11.1)                                                     | 4 (18.2)                                                     | 7 (9.2)                                   | 3 (8.6)                     |
| High, clinically significant                 | 0                                                            | 0                                                            | 1 (4.5)                                                      | 1 (1.3)                                   | 0                           |
| Day 140/week 20                              | 27                                                           | 26                                                           | 23                                                           | 76                                        | 35                          |
| Low, clinically significant                  | 0                                                            | 0                                                            | 0                                                            | 0                                         | 0                           |
| Low, not clinically significant              | 0                                                            | 0                                                            | 0                                                            | 0                                         | 1 (2.9)                     |

|                                  |           |           |           |           |           |
|----------------------------------|-----------|-----------|-----------|-----------|-----------|
| Normal                           | 24 (88.9) | 22 (84.6) | 19 (82.6) | 65 (85.5) | 34 (97.1) |
| High, not clinically significant | 3 (11.1)  | 4 (15.4)  | 3 (13.0)  | 10 (13.2) | 0         |
| High, clinically significant     | 0         | 0         | 1 (4.3)   | 1 (1.3)   | 0         |
| Day 182/early termination        | 26        | 28        | 25        | 79        | 38        |
| Low, clinically significant      | 0         | 0         | 0         | 0         | 0         |
| Low, not clinically significant  | 0         | 0         | 0         | 0         | 0         |
| Normal                           | 26 (100)  | 24 (85.7) | 21 (84.0) | 71 (89.9) | 38 (100)  |
| High, not clinically significant | 0         | 4 (14.3)  | 4 (16.0)  | 8 (10.1)  | 0         |
| High, clinically significant     | 0         | 0         | 0         | 0         | 0         |
| Day 238/follow-up                | 1         | 1         | 0         | 2         | 2         |
| Low, clinically significant      | 0         | 0         | 0         | 0         | 0         |
| Low, not clinically significant  | 0         | 0         | 0         | 0         | 0         |
| Normal                           | 1 (100)   | 1 (100)   | 0         | 2 (100)   | 2 (100)   |
| High, not clinically significant | 0         | 0         | 0         | 0         | 0         |
| High, clinically significant     | 0         | 0         | 0         | 0         | 0         |

**eTable 15. Shift Table of Highest Activated Partial Thromboplastin Time**

Abbreviation: ULN, upper limit of normal.

| Activated Partial Thromboplastin Time (Post-treatment) | Placebo (n = 41)    |                     | Lanadelumab Total (n = 84) |                     |
|--------------------------------------------------------|---------------------|---------------------|----------------------------|---------------------|
|                                                        | Pretreatment        |                     | Pretreatment               |                     |
|                                                        | ≤1.5 × ULN, No. (%) | >1.5 × ULN, No. (%) | ≤1.5 × ULN, No. (%)        | >1.5 × ULN, No. (%) |
| ≤1.5 × ULN                                             | 41 (100)            | 0                   | 83 (98.8)                  | 0                   |
| >1.5 × ULN                                             | 0                   | 0                   | 1 (1.2)                    | 0                   |

**eTable 16. Clinically Significant Activated Partial Thromboplastin Time Results**

| Patient                          | Visit                    | Result, sec | Range Flag | Clinically Significant Flag |
|----------------------------------|--------------------------|-------------|------------|-----------------------------|
| Placebo                          |                          |             |            |                             |
| 1                                | Screening                | 29.2        | N          | No<br>Yes<br>No             |
|                                  | Day 0/week 0             | 34.1        | N          |                             |
|                                  | Day 28/week 4            | 49.5        | H          |                             |
|                                  | Day 56/week 8            | 47.8        | H          |                             |
|                                  | Day 98/week 14           | 40.1        | H          |                             |
|                                  | Day 140/week 20          | 26.6        | N          |                             |
|                                  | Day 182/end of treatment | 24.8        | N          |                             |
| Lanadelumab 300 mg every 2 weeks |                          |             |            |                             |
| 2                                | Screening                | 32.7        | N          | Yes<br>No                   |
|                                  | Day 0/week 0             | 28.5        | N          |                             |
|                                  | Day 28/week 4            | 40          | H          |                             |
|                                  | Day 56/week 8            | 39.1        | N          |                             |
|                                  | Day 140/week 20          | 59.7        | H          |                             |
|                                  | Day 182/end of treatment | 35.6        | N          |                             |
| 3                                | Screening                | 24.2        | N          | Yes                         |
|                                  | Day 0/week 0             | 23.3        | N          |                             |
|                                  | Day 28/week 4            | 33.3        | N          |                             |
|                                  | Day 56/week 8            | 30.8        | N          |                             |
|                                  | Day 98/week 14           | 42.5        | H          |                             |
|                                  | Day 140/week 20          | 39.5        | N          |                             |
|                                  | Day 182/end of treatment | 37.3        | N          |                             |
| 4                                | Screening                | 40.2        | H          | No<br>Yes<br>No             |
|                                  | Day 0/week 0             | 30.6        | N          |                             |
|                                  | Day 28/week 4            | 54.9        | H          |                             |
|                                  | Day 56/week 8            | 30          | N          |                             |
|                                  | Day 98/week 14           | 42.5        | H          |                             |
|                                  | Day 140/week 20          | 36.8        | N          |                             |
|                                  | Day 182/end of treatment | 38.8        | N          |                             |
| 5                                | Screening                | 32.2        | N          | No<br>No<br>No<br>No<br>Yes |
|                                  | Day 0/week 0             | 42.3        | H          |                             |
|                                  | Day 28/week 4            | 49.4        | H          |                             |
|                                  | Day 56/week 8            | 48.1        | H          |                             |
|                                  | Day 98/week 14           | 50          | H          |                             |
|                                  | Day 140/week 20          | 49.3        | H          |                             |
|                                  | Day 182/end of treatment | 35          | N          |                             |

Abbreviations: H, high; N, normal.  
Reference range is 20.6-39.9 seconds.

**eTable 17. Summary of Immunogenicity Response**

| <b>Parameter, No. (%)</b>                   | <b>Lanadelumab<br/>150 mg<br/>Every 4 Weeks<br/>(n = 28)</b> | <b>Lanadelumab<br/>300 mg<br/>Every 4 Weeks<br/>(n = 29)</b> | <b>Lanadelumab<br/>300 mg<br/>Every 2 Weeks<br/>(n = 27)</b> | <b>Lanadelumab<br/>Total<br/>(n = 84)</b> | <b>Placebo<br/>(n = 41)</b> |
|---------------------------------------------|--------------------------------------------------------------|--------------------------------------------------------------|--------------------------------------------------------------|-------------------------------------------|-----------------------------|
| Antidrug antibody prevalence <sup>a</sup>   | 5 (17.9)                                                     | 3 (10.3)                                                     | 4 (14.8)                                                     | 12 (14.3)                                 | 3 (7.3)                     |
| Antidrug antibody incidence <sup>b</sup>    | 5 (17.9)                                                     | 3 (10.3)                                                     | 2 (7.4)                                                      | 10 (11.9)                                 | 2 (4.9)                     |
| Pre-existing antidrug antibody <sup>c</sup> | 0                                                            | 1 (3.4)                                                      | 2 (7.4)                                                      | 3 (3.6)                                   | 1 (2.4)                     |
| Treatment induced <sup>d</sup>              | 5 (17.9)                                                     | 2 (6.9)                                                      | 2 (7.4)                                                      | 9 (10.7)                                  | 2 (4.9)                     |
| Treatment boosted <sup>e</sup>              | 0                                                            | 1 (3.4) <sup>f</sup>                                         | 0                                                            | 1 (1.2)                                   | 0                           |
| Non-neutralizing antidrug antibody          | 3 (10.7)                                                     | 3 (10.3)                                                     | 4 (14.8)                                                     | 10 (11.9)                                 | 3 (7.3)                     |
| Neutralizing antidrug antibody              | 2 (7.1)                                                      | 0                                                            | 0                                                            | 2 (2.4)                                   | 0                           |

No. denotes the number of patients experiencing the event.

<sup>a</sup> Prevalence was defined as the proportion of the study population having drug-reactive antibodies (including pre-existing antibodies) at any time point.

<sup>b</sup> Incidence was defined as the proportion of the study population found to have seroconverted or boosted their pre-existing antidrug antibodies during the study period.

<sup>c</sup> Pre-existing antidrug antibody refers to a signal detected before treatment.

<sup>d</sup> Treatment-induced responses were characterized by a negative pretreatment sample with  $\geq 1$  positive sample at a subsequent time point.

<sup>e</sup> Treatment-boosted responses were characterized by a positive pretreatment sample that was boosted to a higher level following drug administration.

<sup>f</sup> One additional patient with pre-existing antidrug antibodies had a positive sample post dose; however, because the titer was the same as the pretreatment sample it was not considered to be treatment boosted.



**eTable 18. Summary of Positive Immunogenicity Results**

| Patient                          | Visit                    | Result   | Titer | Neutralizing Antibody | Result Category                                                      |
|----------------------------------|--------------------------|----------|-------|-----------------------|----------------------------------------------------------------------|
| Placebo                          |                          |          |       |                       |                                                                      |
| 1                                | Day 0/week 0             | Positive | 20    | Negative              | Pre-existing antidrug antibody<br>Non-neutralizing antidrug antibody |
|                                  | Day 56/week 8            | Negative | NA    | NA                    |                                                                      |
|                                  | Day 98/week 14           | Negative | NA    | NA                    |                                                                      |
|                                  | Day 140/week 20          | Negative | NA    | NA                    |                                                                      |
|                                  | Day 182/end of treatment | Negative | NA    | NA                    |                                                                      |
|                                  | Day 238/follow-up        | Negative | NA    | NA                    |                                                                      |
| 2                                | Day 0/week 0             | Negative | NA    | NA                    | Treatment induced<br>Non-neutralizing antidrug antibody              |
|                                  | Day 56/week 8            | Negative | NA    | NA                    |                                                                      |
|                                  | Day 98/week 14           | Negative | NA    | NA                    |                                                                      |
|                                  | Day 140/week 20          | Negative | NA    | NA                    |                                                                      |
|                                  | Day 182/end of treatment | Positive | 20    | Negative              |                                                                      |
|                                  |                          |          |       |                       |                                                                      |
| 3                                | Day 0/week 0             | Negative | NA    | NA                    | Treatment induced<br>Transient<br>Non-neutralizing antidrug antibody |
|                                  | Day 56/week 8            | Negative | NA    | NA                    |                                                                      |
|                                  | Day 98/week 14           | Positive | 640   | Negative              |                                                                      |
|                                  | Day 140/week 20          | Negative | NA    | NA                    |                                                                      |
|                                  | Day 182/end of treatment | Negative | NA    | NA                    |                                                                      |
|                                  |                          |          |       |                       |                                                                      |
| Lanadelumab 150 mg every 4 weeks |                          |          |       |                       |                                                                      |
| 4                                | Day 0/week 0             | Negative | NA    | NA                    | Treatment induced<br><b>Neutralizing antidrug antibody</b>           |
|                                  | Day 56/week 8            | Negative | NA    | NA                    |                                                                      |
|                                  | Day 98/week 14           | Negative | NA    | NA                    |                                                                      |
|                                  | Day 140/week 20          | Positive | 40    | <b>Positive</b>       |                                                                      |
|                                  | Day 182/end of treatment | Positive | 640   | <b>Positive</b>       |                                                                      |
|                                  |                          |          |       |                       |                                                                      |
| 5                                | Day 0/week 0             | Negative | NA    | NA                    | Treatment induced<br>Non-neutralizing antidrug antibody              |
|                                  | Day 56/week 8            | Negative | NA    | NA                    |                                                                      |
|                                  | Day 98/week 14           | Negative | NA    | NA                    |                                                                      |
|                                  | Day 140/week 20          | Positive | 20    | Negative              |                                                                      |
|                                  | Day 182/end of treatment | Positive | 40    | Negative              |                                                                      |
|                                  |                          |          |       |                       |                                                                      |
| 6                                | Day 0/week 0             | Negative | NA    | NA                    | Treatment induced<br><b>Neutralizing antidrug antibody</b>           |
|                                  | Day 98/week 14           | Positive | CNBD  | <b>Positive</b>       |                                                                      |
|                                  | Day 140/week 20          | Positive | 40    | <b>Positive</b>       |                                                                      |
|                                  | Day 182/end of treatment | Positive | 160   | Negative              |                                                                      |

|                                  |                                                                                                |                                                          |                             |                                              |                                                                                           |
|----------------------------------|------------------------------------------------------------------------------------------------|----------------------------------------------------------|-----------------------------|----------------------------------------------|-------------------------------------------------------------------------------------------|
| 7                                | Day 0/week 0<br>Day 56/week 8<br>Day 98/week 14<br>Day 140/week 20<br>Day 182/end of treatment | Negative<br>Negative<br>Negative<br>Negative<br>Positive | NA<br>NA<br>NA<br>NA<br>20  | NA<br>NA<br>NA<br>NA<br>Negative             | Treatment induced<br>Non-neutralizing antidrug antibody                                   |
| 8                                | Day 0/week 0<br>Day 56/week 8<br>Day 98/week 14<br>Day 140/week 20<br>Day 182/end of treatment | Negative<br>Negative<br>Negative<br>Positive<br>Positive | NA<br>NA<br>20<br>20<br>20  | NA<br>NA<br>NA<br>Negative<br>Negative       | Treatment induced<br>Non-neutralizing antidrug antibody                                   |
| Lanadelumab 300 mg every 4 weeks |                                                                                                |                                                          |                             |                                              |                                                                                           |
| 9                                | Day 0/week 0<br>Day 56/week 8<br>Day 98/week 14<br>Day 140/week 20<br>Day 182/end of treatment | Negative<br>Negative<br>Negative<br>Positive<br>Negative | NA<br>NA<br>NA<br>40<br>NA  | NA<br>NA<br>NA<br>Negative<br>NA             | Treatment induced<br>Transient<br>Non-neutralizing antidrug antibody                      |
| 10                               | Day 0/Week 0<br>Day 56/week 8<br>Day 98/week 14<br>Day 140/week 20<br>Day 182/end of treatment | Positive<br>Negative<br>Negative<br>Positive<br>Positive | 40<br>NA<br>NA<br>20<br>128 | Negative<br>NA<br>NA<br>Negative<br>Negative | Pre-existing antidrug antibody<br>Treatment boosted<br>Non-neutralizing antidrug antibody |
| 11                               | Day 0/week 0<br>Day 56/week 8<br>Day 98/week 14<br>Unscheduled<br>Day 182/end of treatment     | Negative<br>Negative<br>Negative<br>Positive<br>Negative | NA<br>NA<br>NA<br>40<br>NA  | NA<br>NA<br>NA<br>Negative<br>NA             | Treatment induced<br>Transient<br>Non-neutralizing antidrug antibody                      |
| Lanadelumab 300 mg every 2 weeks |                                                                                                |                                                          |                             |                                              |                                                                                           |
| 12                               | Day 0/week 0<br>Day 56/week 8<br>Day 98/week 14<br>Day 140/week 20<br>Day 182/end of treatment | Negative<br>Negative<br>Negative<br>Negative<br>Positive | NA<br>NA<br>NA<br>NA<br>20  | NA<br>NA<br>NA<br>NA<br>Negative             | Treatment induced<br>Non-neutralizing antidrug antibody                                   |
| 13                               | Day 0/week 0<br>Day 56/week 8<br>Unscheduled<br>Day 140/week 20<br>Day 182/end of treatment    | Positive<br>Negative<br>Negative<br>Negative<br>Negative | 160<br>NA<br>NA<br>NA<br>NA | Negative<br>NA<br>NA<br>NA<br>NA             | Pre-existing antidrug antibody<br>Non-neutralizing antidrug antibody                      |

|    |                                                                                                |                                                          |                               |                                        |                                                                      |
|----|------------------------------------------------------------------------------------------------|----------------------------------------------------------|-------------------------------|----------------------------------------|----------------------------------------------------------------------|
| 14 | Day 0/week 0<br>Day 56/week 8<br>Day 98/week 14<br>Day 140/week 20<br>Day 182/end of treatment | Positive<br>Negative<br>Negative<br>Positive<br>Negative | 20<br>NA<br>NA<br>20<br>NA    | Negative<br>NA<br>NA<br>Negative<br>NA | Pre-existing antidrug antibody<br>Non-neutralizing antidrug antibody |
| 15 | Day 0/week 0<br>Day 56/week 8<br>Day 98/week 14<br>Day 140/week 20<br>Day 182/end of treatment | Negative<br>Negative<br>Positive<br>Positive<br>Negative | NA<br>NA<br>CNBD<br>320<br>NA | NA<br>NA<br>Negative<br>Negative<br>NA | Treatment induced<br>Non-neutralizing antidrug antibody              |

Abbreviations: CNBD, could not be determined; NA, not applicable.
