# Supplementary material
Source: PubMed Central journal article supplement (PMC6583584)
Supplement: jama-320-2108-s003.pdf [file jama-320-2108-s003.pdf]

## **Data Sharing Statement**

Banerji. Effect of Lanadelumab Compared With Placebo on Prevention of Hereditary Angioedema Attacks. *JAMA*. Published November 27, 2018. 10.1001/jama.2018.16773

### **Data**

**Data available:** No
